# Supplementary material for: Proline isomerization effects in the amyloidogenic protein β2-microglobulin
Source: Royal Society of Chemistry journal article supplement (doi:10.1039/d0cp04780e), 2020-12-21
Supplement: d0cp04780e7.pdf [file d0cp04780e7.pdf]

# Supporting Information: Proline isomerization effects in the amyloidogenic protein

## $\beta_2$ -microglobulin

M.C. Maschio *et al.*\*

E-mail: stefano.corni@unipd.it

### Supplementary Figures

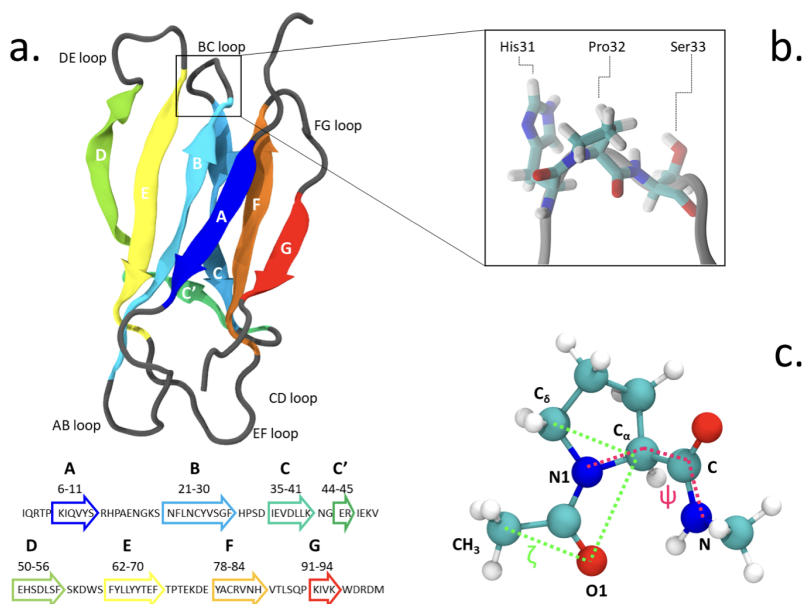

Figure S1: **Simulated system**— This is also Fig. 1 in the main text and is reported here for convenience. In Fig. S1, the  $\zeta$  coordinate is defined as in Panel c). In Figs S2 and S3, the color scheme of the residues which aids reading the hydrogen bond network is retained from panel a)

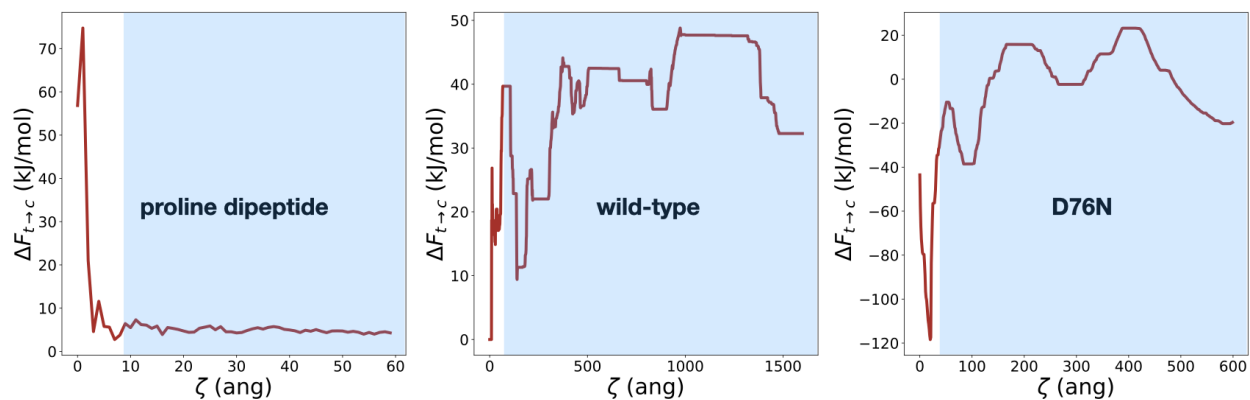

Figure S2: **Relative stability between the *trans*- and *cis*-Pro32**— Relative stability (in kJ/mol) of the isomers during the metadynamics simulations. The white window accounts for the equilibration time, so it is discarded for the integration. The free energy profiles in Fig. 2 of the main text are obtained by integrating the free energy for each  $\zeta$  point of the curve. The time window for the integration is reported in light blue. The integration procedure is described in Ref. 52 of the main text.

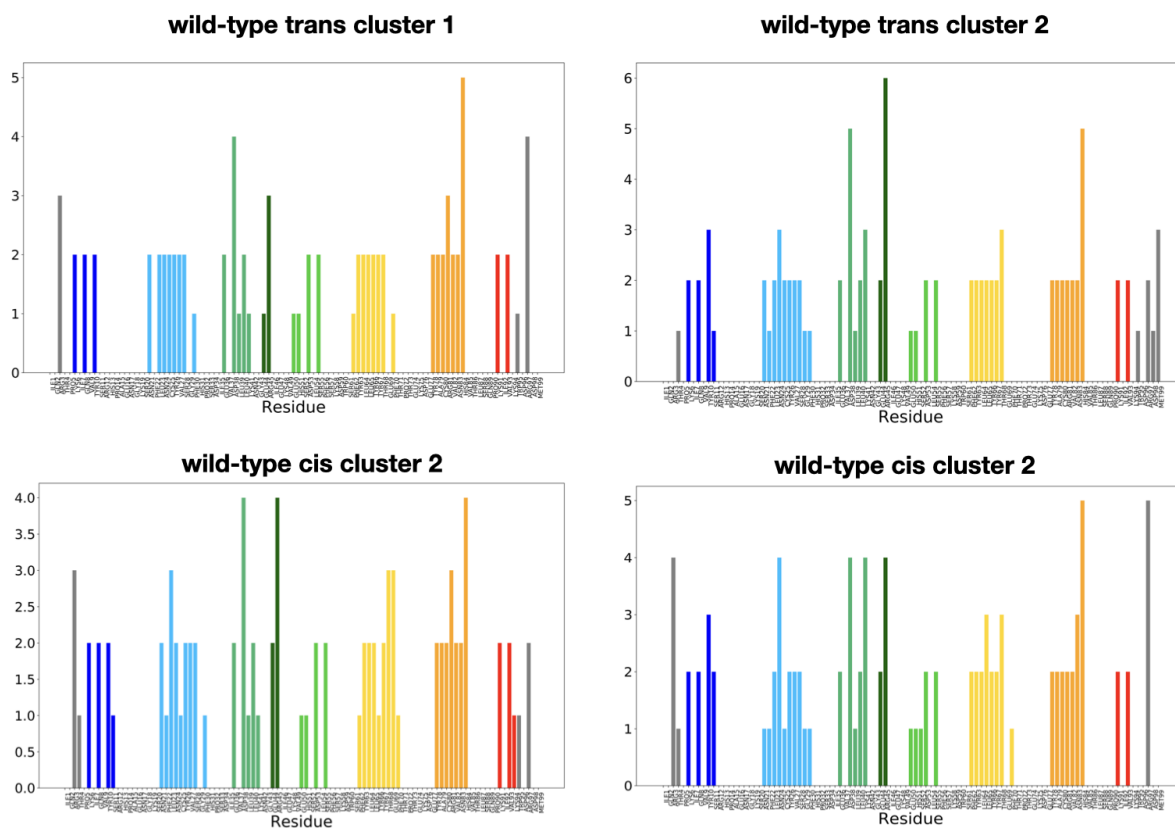

Figure S3: **Normalized hydrogen bond occurrence for each residue and each conformation during the metadynamics for the wild-type**— The configurations of the proteins are clustered from the snapshots of the metadynamics by selecting the  $\psi$  and  $\zeta$  coordinates. The selection window surrounds the minima of the maps reported in Fig. 2. The structures sampled correspond to the most probable structures of the protein when Pro32 is in *trans* or *cis*. The color scheme refers to Fig. S1

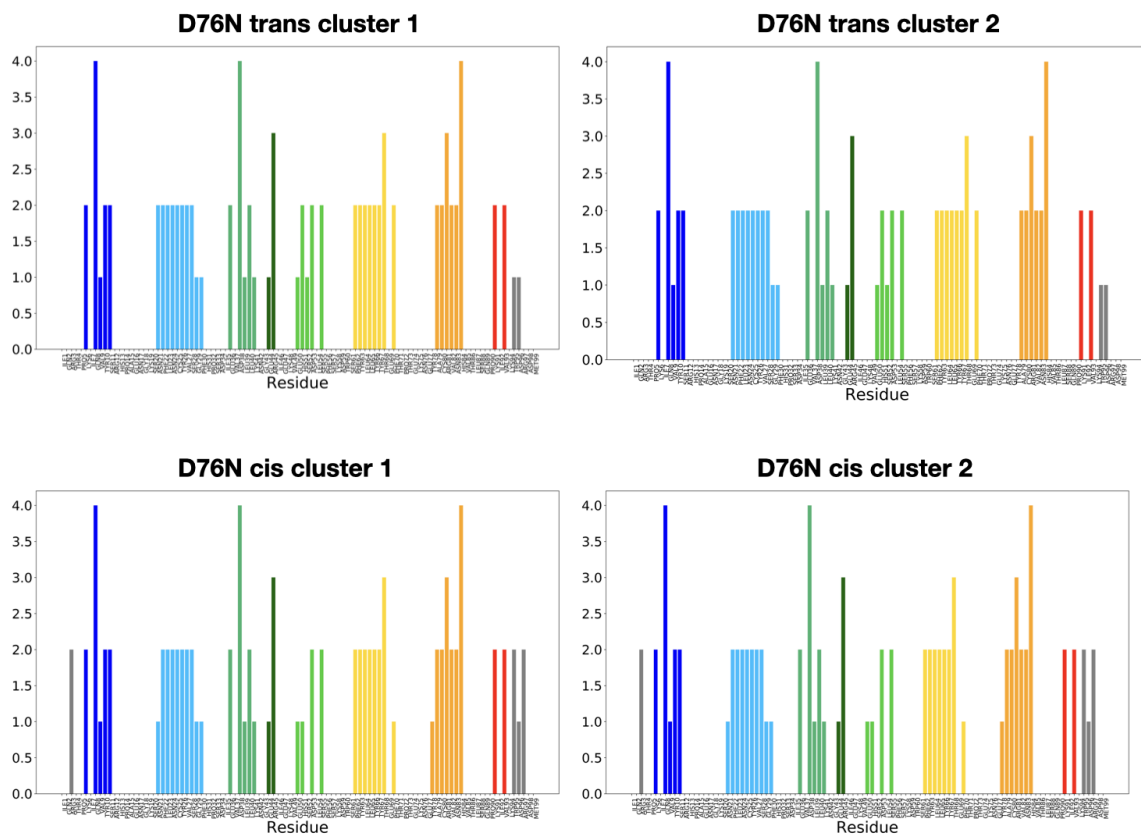

Figure S4: Normalized hydrogen bond occurrence for each residue and each conformation during the metadynamics for D76N— The color scheme refers to Figure S1

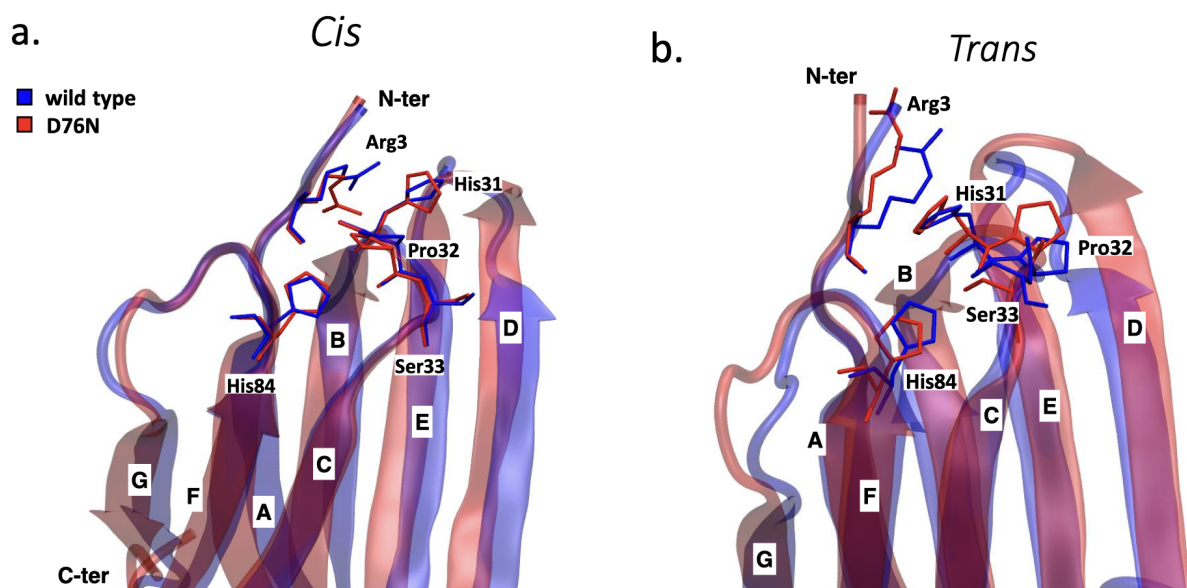

Figure S5: **Structure alignment of the residues surrounding *cis* and *trans* Pro32**—. Starting from the most populated clusters of the free energy minima, we show the arrangement of the relevant residues to the h-bond network presented in Table 2 and Figure 3 of the main text, focussing on the surroundings of the Pro32.
