# Supplementary figures and images for: Proline isomerization effects in the amyloidogenic protein β2-microglobulin
Source: Royal Society of Chemistry journal article supplement (doi:10.1039/d0cp04780e), 2020-12-21

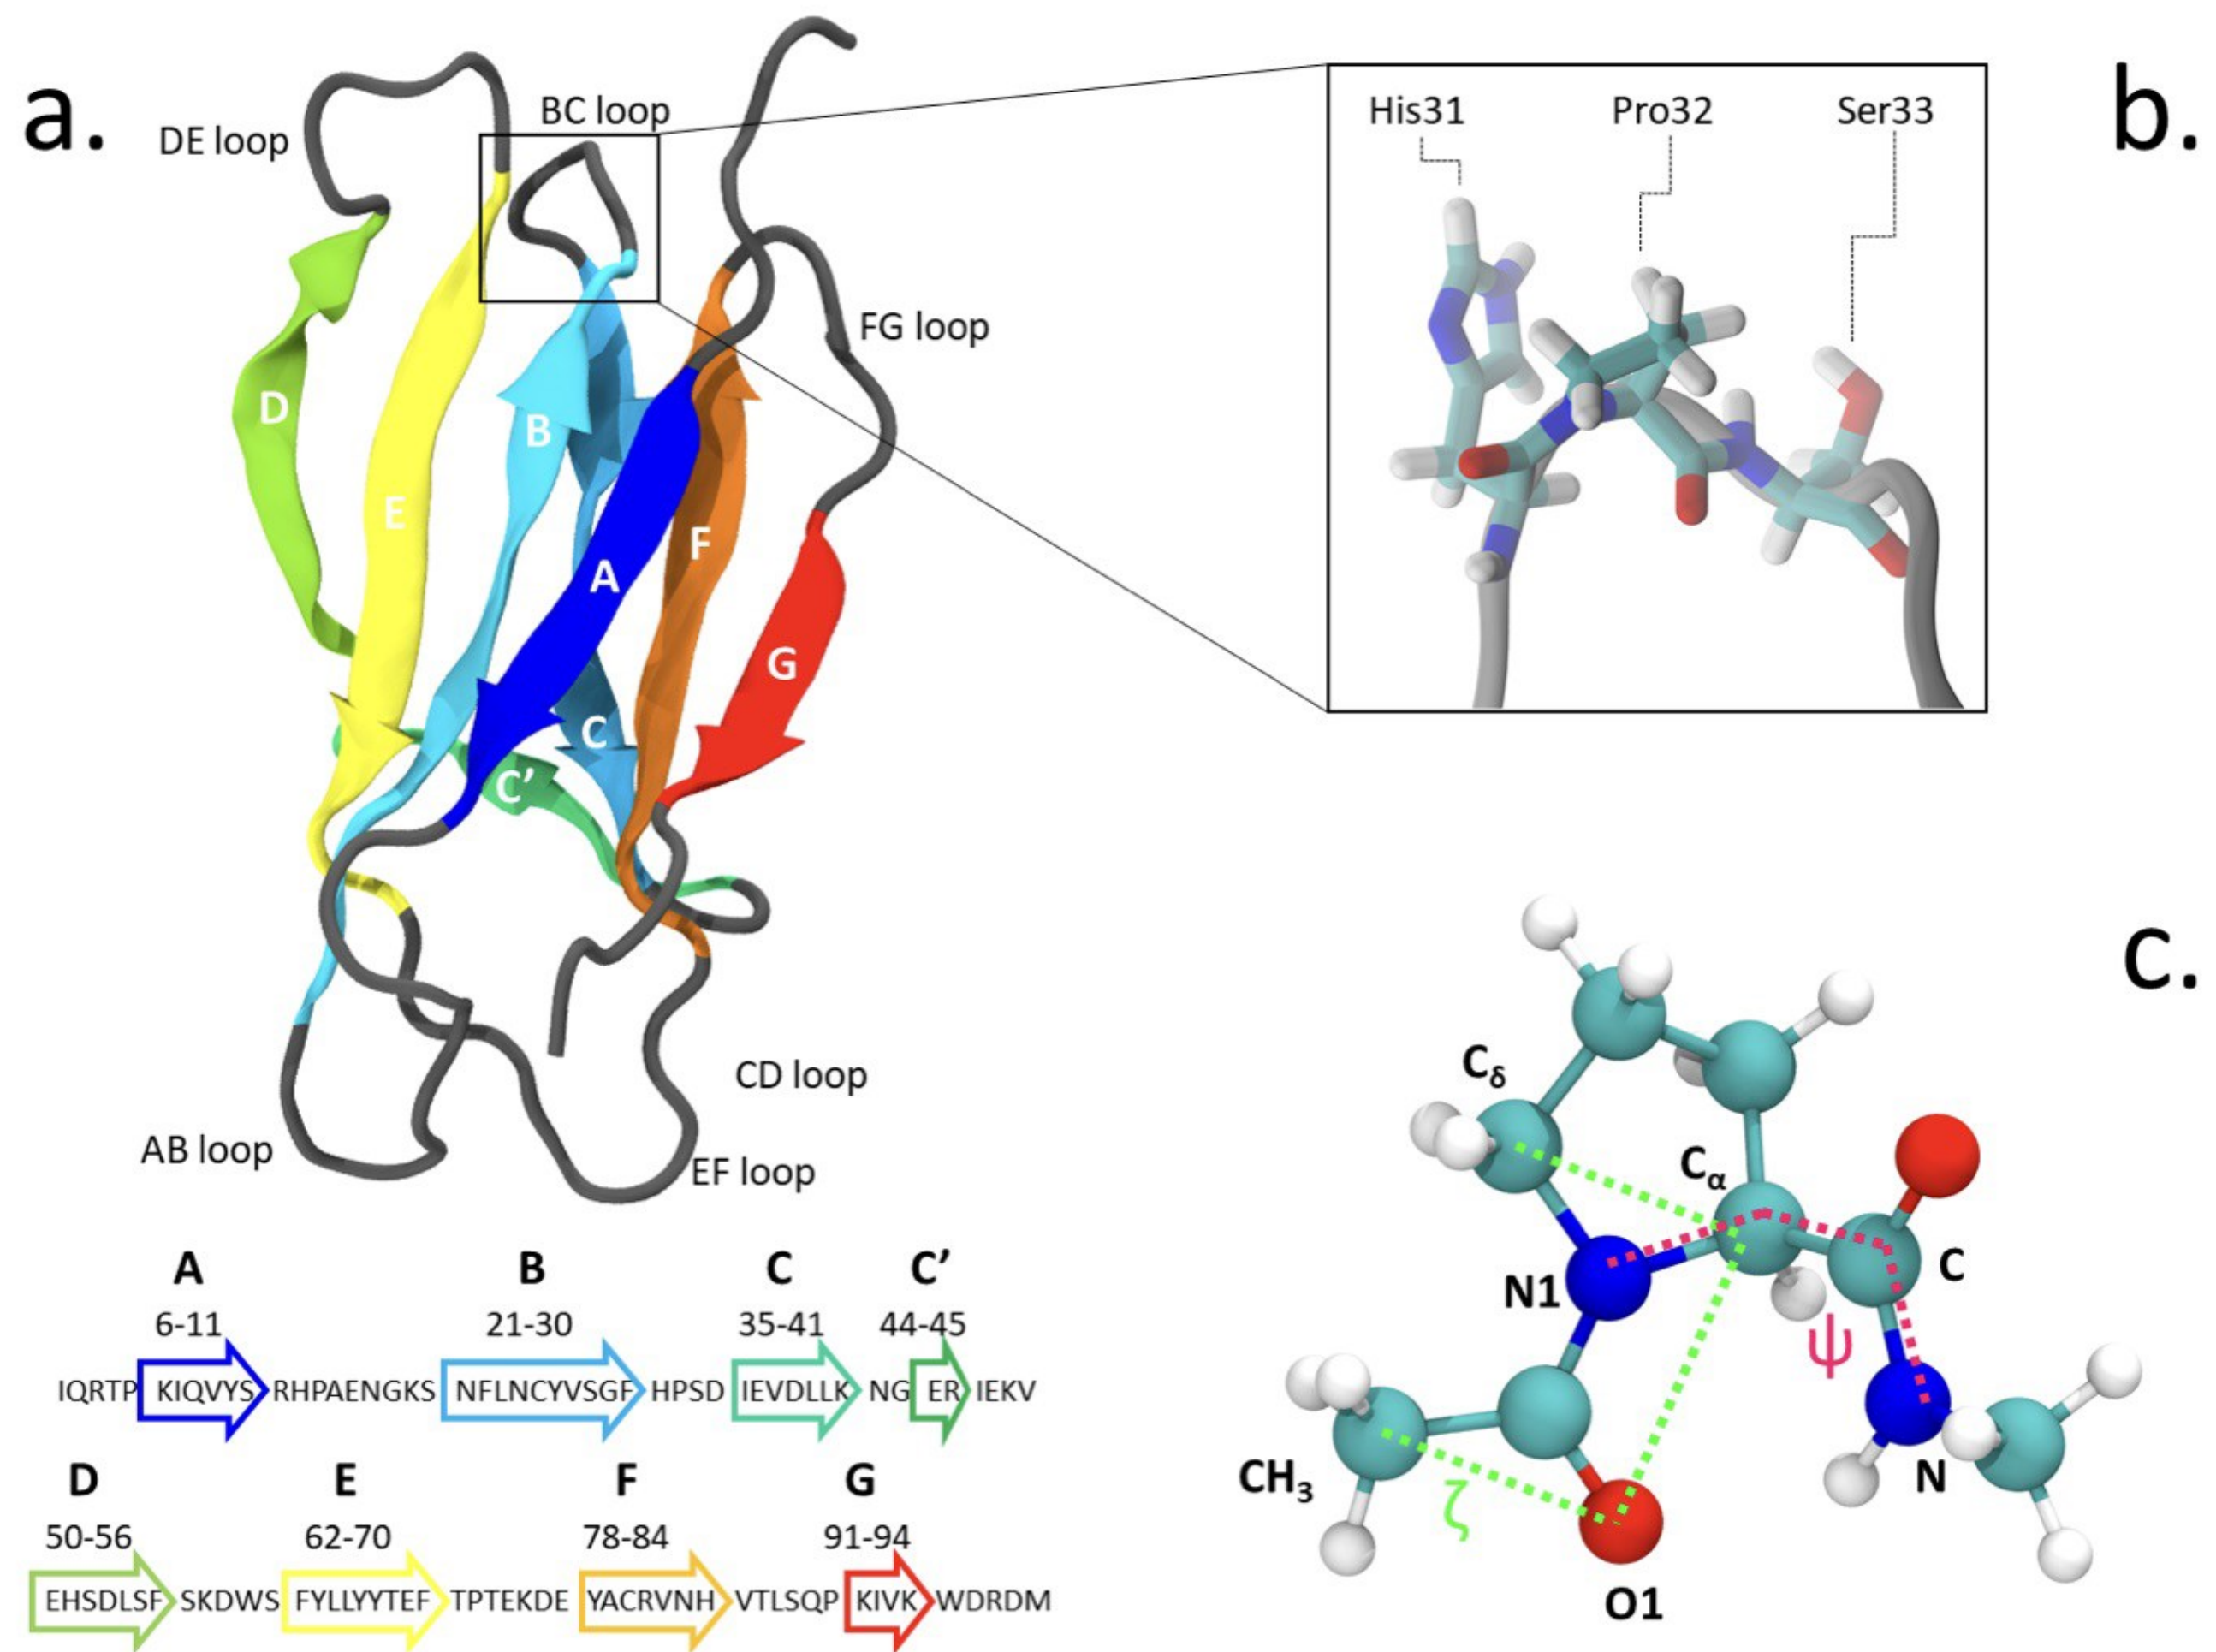

Supplement: d0cp04780e2.pdf [file d0cp04780e2.pdf]

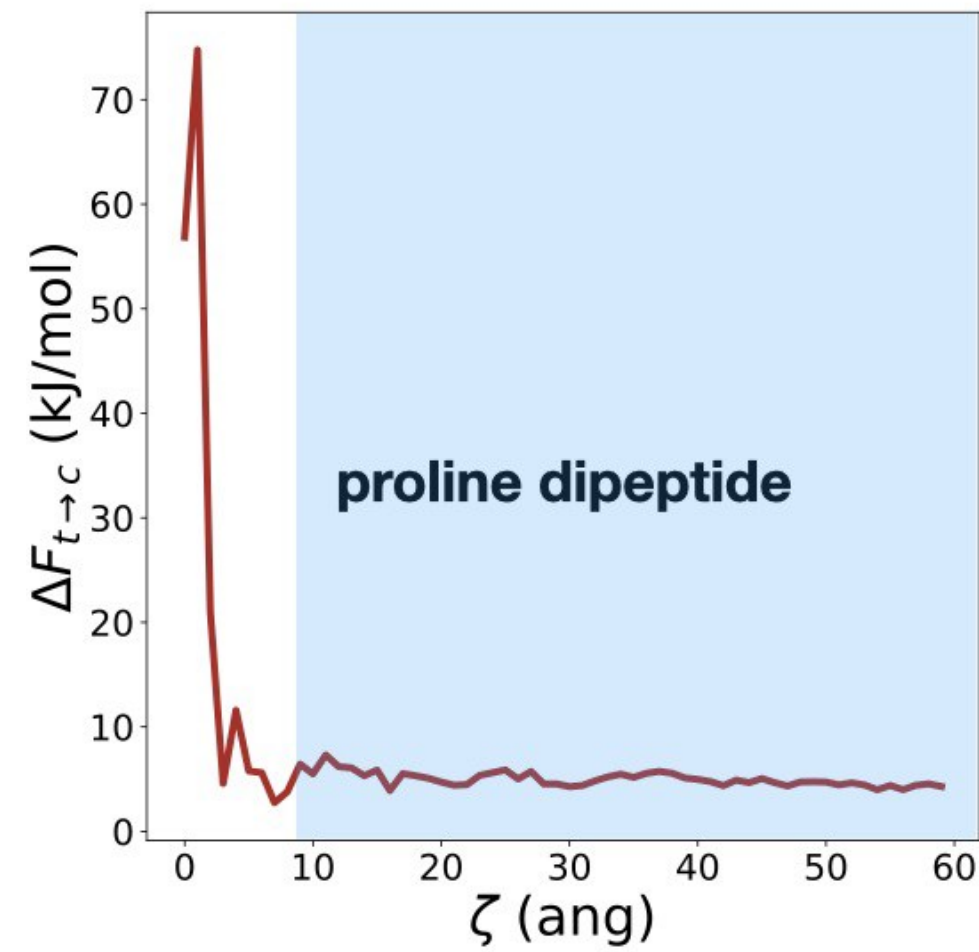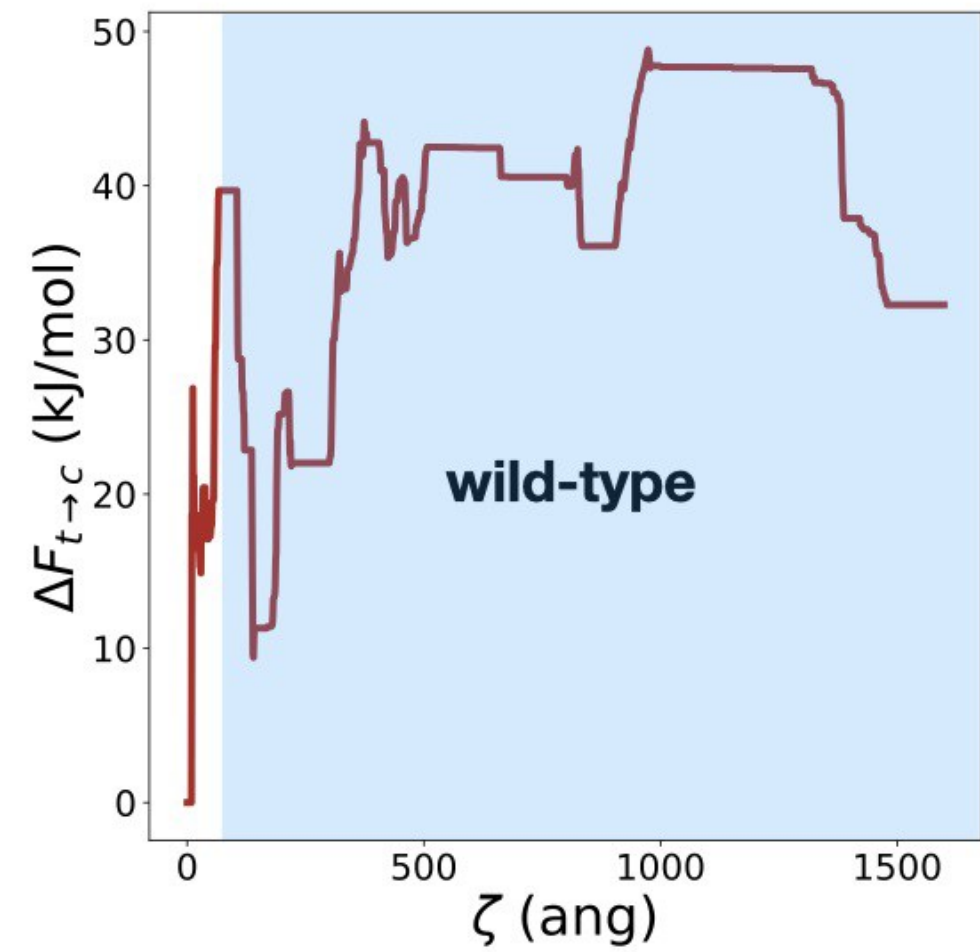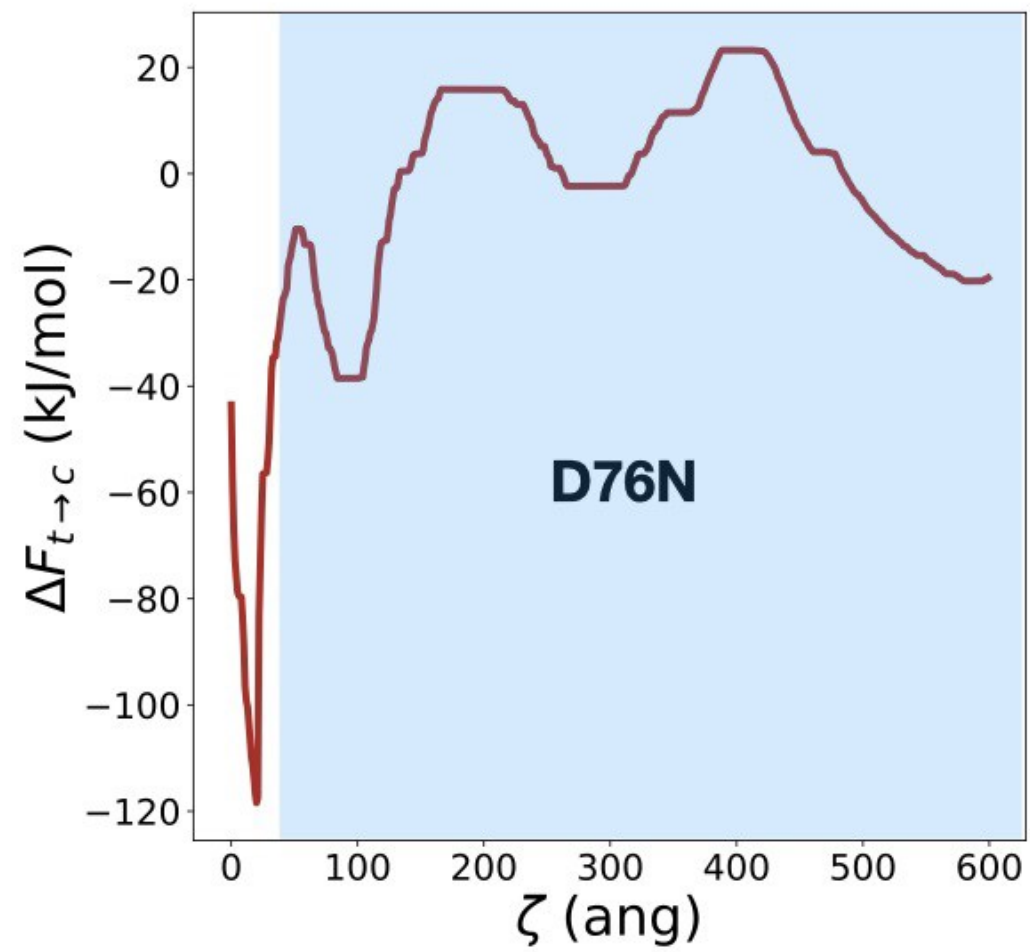

Supplement: d0cp04780e3.pdf [file d0cp04780e3.pdf]

a.

*Cis*

■ wild type  
■ D76N

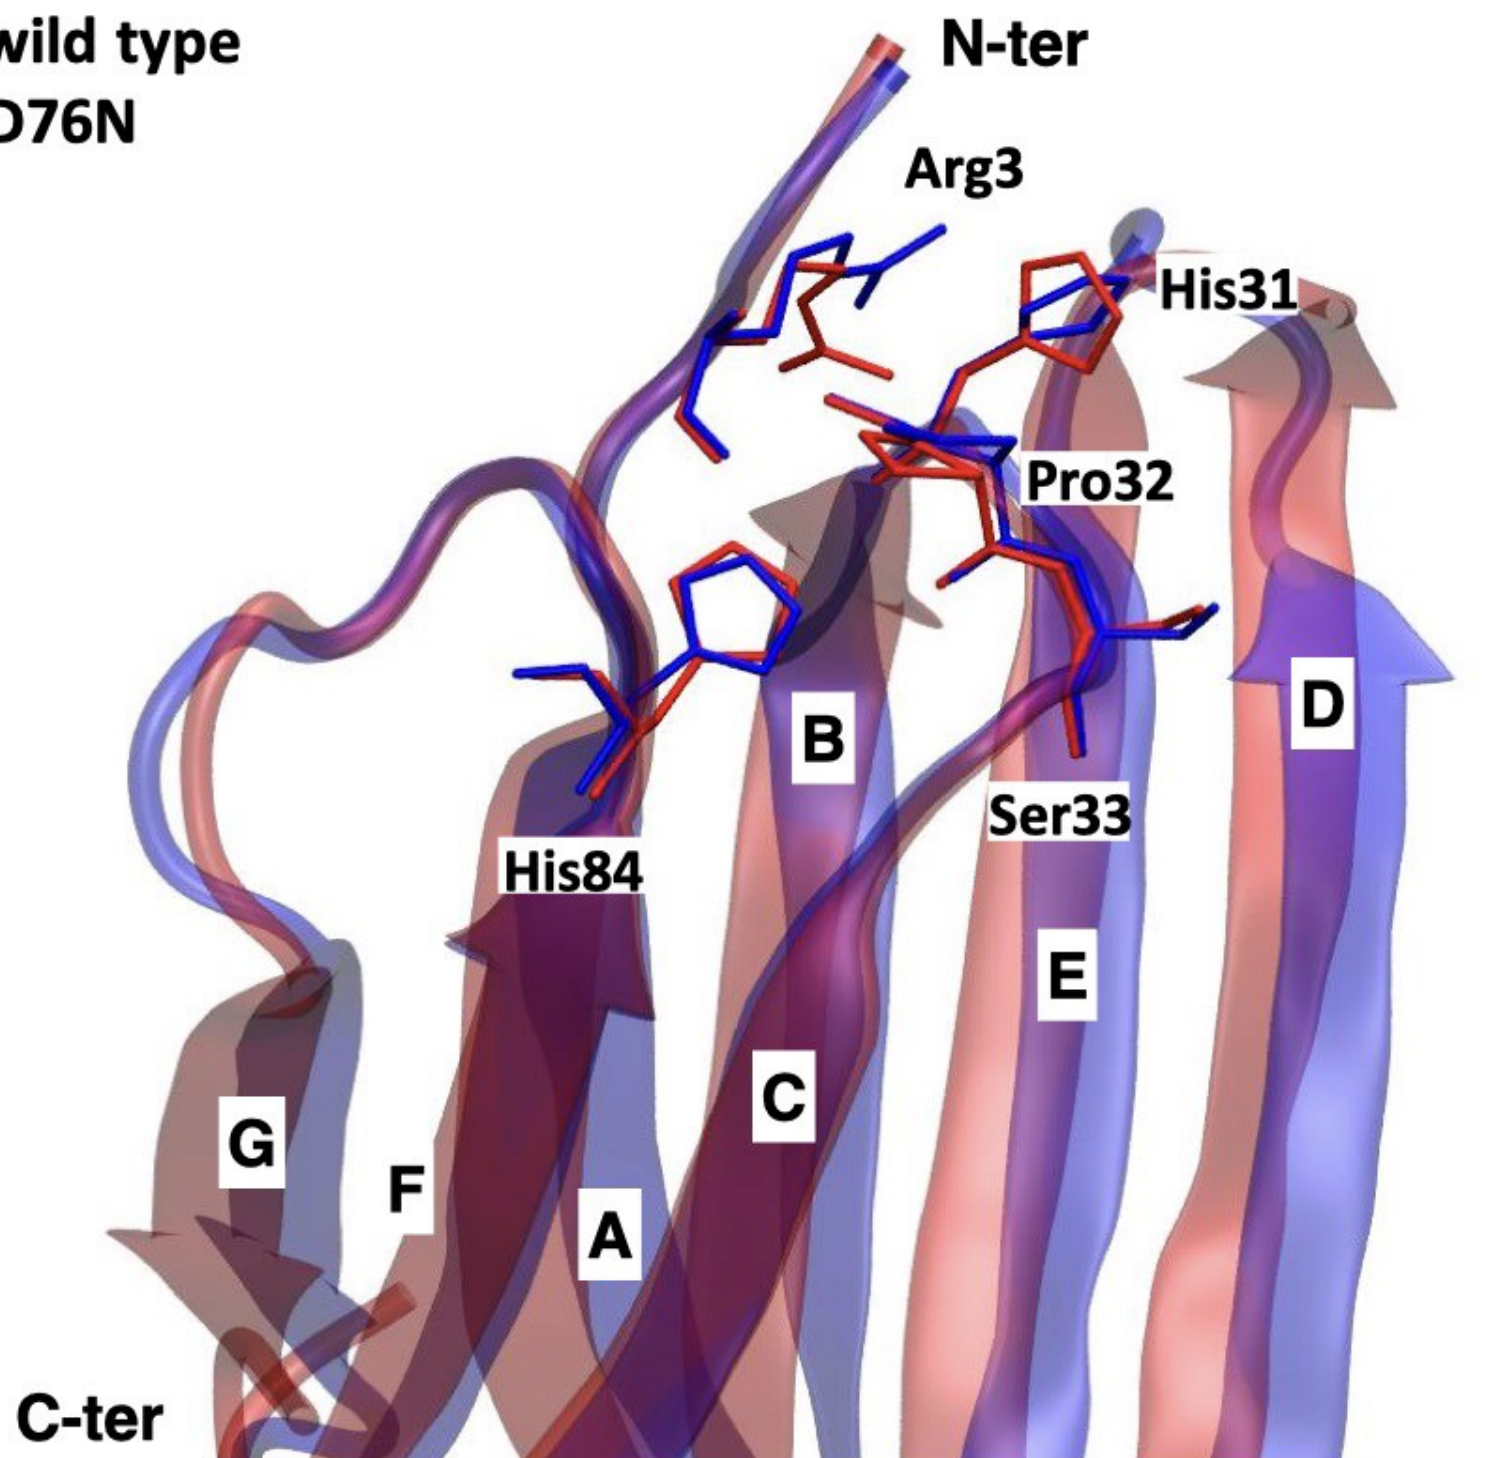

b.

*Trans*

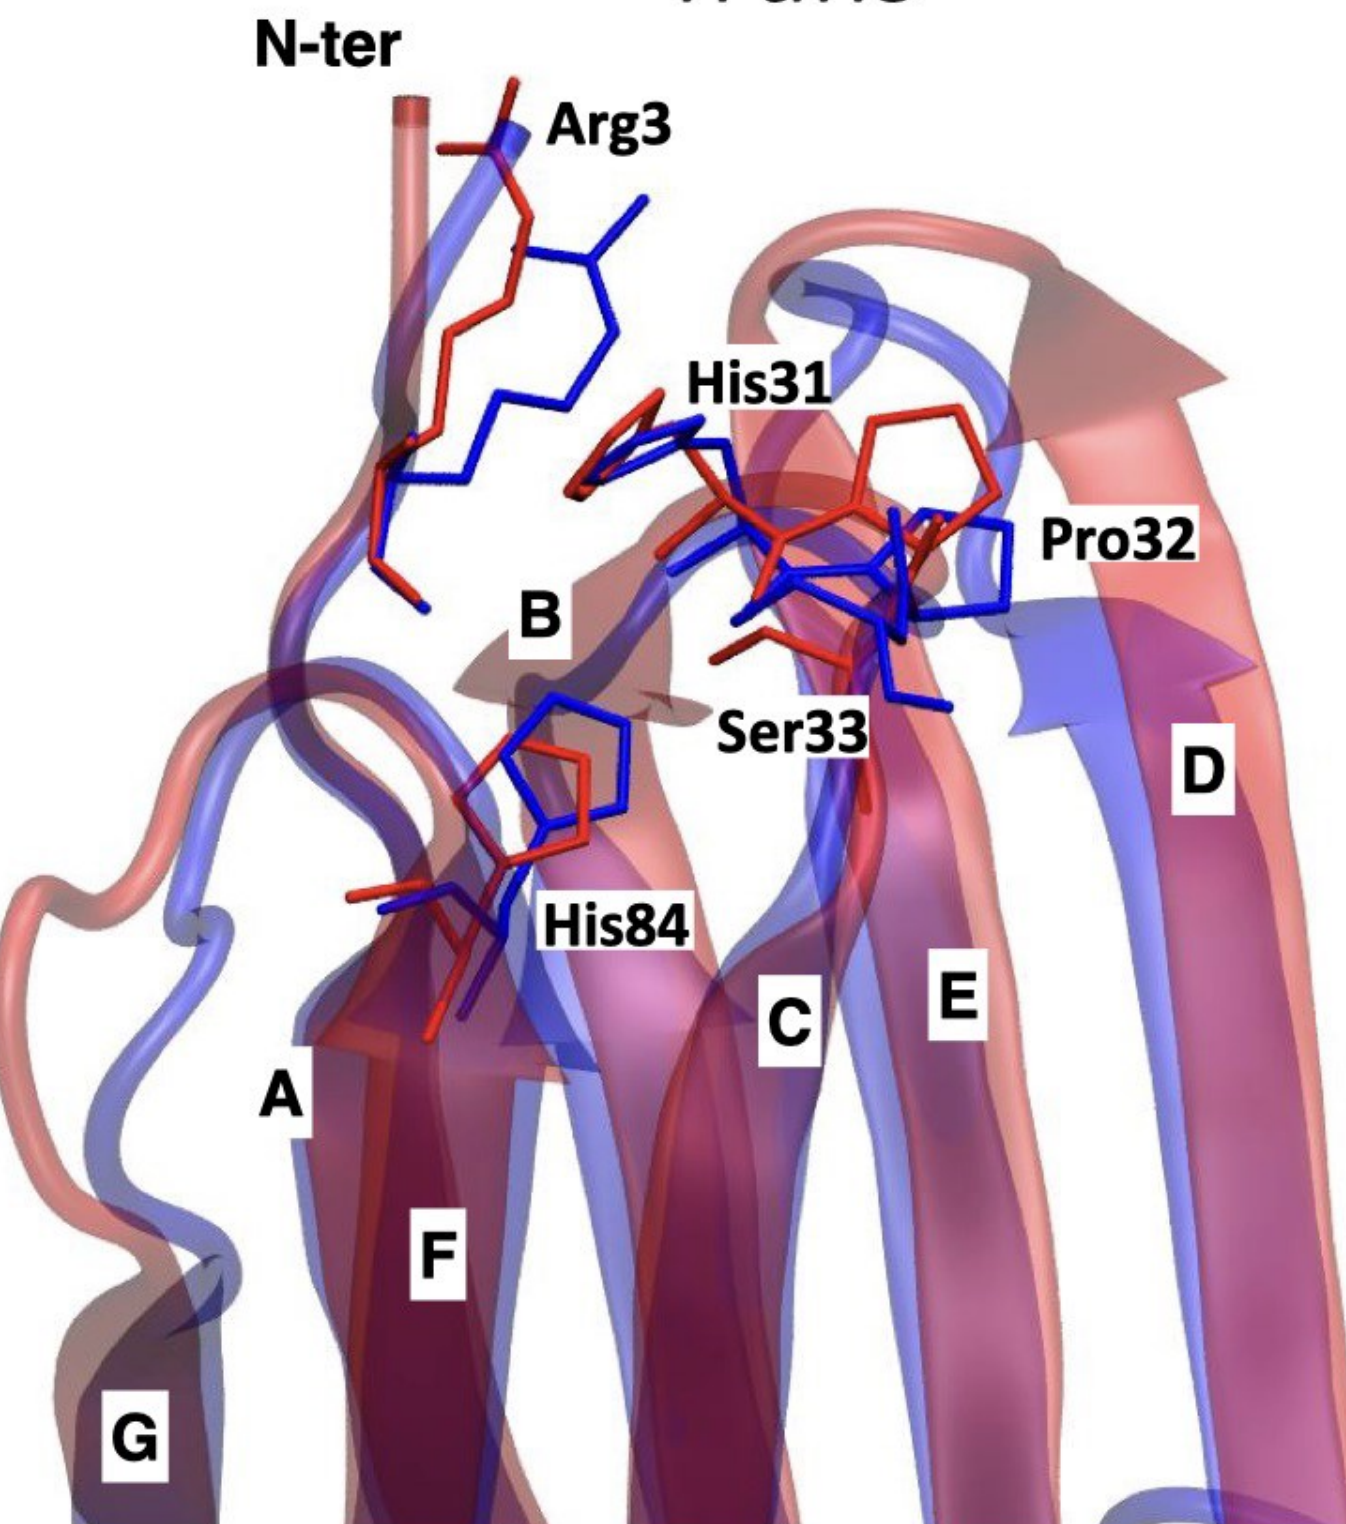

Supplement: d0cp04780e6.pdf [file d0cp04780e6.pdf]
